# Supplementary material for: Probiotics for the Prevention of Ventilator-Associated Pneumonia: An Updated Systematic Review and Meta-Analysis of Randomised Controlled Trials
Source: MDPI journal article supplement (doi:10.3390/nu14081600), 2022-04-12

## **Supplementary Material**

### **Probiotics for the prevention of ventilator-associated pneumonia: an updated systematic review and meta-analysis of randomized controlled trials**

**Supplementary Table S1.** Prisma 2020 checklist

**Supplementary Table S2.** Search strategies for online databases

**Supplementary Figure S1.** Funnel plot for incidence of VAP

**Supplementary Figure S2.** Effect of probiotics on the duration of mechanical ventilation

**Supplementary Figure S3.** Funnel plot for the duration of mechanical ventilation

**Supplementary Figure S4.** Effect of probiotics on the length of ICU stay

**Supplementary Figure S5.** Funnel plot for the length of ICU stay

**Supplementary Figure S6.** Effect of probiotics on the length of hospital stay

**Supplementary Figure S7.** Doi plot for the length of hospital stay

**Supplementary Figure S8.** Effect of probiotics on: a) ICU mortality; b) Hospital mortality; c) 28/30-day mortality

**Supplementary Figure S9.** Doi plot for ICU mortality

**Supplementary Figure S10.** Doi plot for hospital mortality

**Supplementary Figure S11.** Doi plot for 28/30-day mortality

**Supplementary Figure S12.** Effect of probiotics on the duration of antibiotic use

**Supplementary Figure S13.** Doi plot for the duration of antibiotic use

**Supplementary Figure S14.** Effect of probiotics on the incidence of diarrhoea

**Supplementary Figure S15.** Doi plot for the incidence of diarrhoea

**Supplementary Figure S16.** Sensitivity analysis by excluding studies at some concerns of bias in the randomization process

This supplemental material has been provided by the authors to give readers additional information about their work.

Supplementary Table S1. PRISMA 2020 checklist

*Abstract*

| Section and Topic       | Item # | Checklist item                                                                                                                                                                                                                                                                                        | Reported (Yes/No)                    |
|-------------------------|--------|-------------------------------------------------------------------------------------------------------------------------------------------------------------------------------------------------------------------------------------------------------------------------------------------------------|--------------------------------------|
| <b>TITLE</b>            |        |                                                                                                                                                                                                                                                                                                       |                                      |
| Title                   | 1      | Identify the report as a systematic review.                                                                                                                                                                                                                                                           | Reported                             |
| <b>BACKGROUND</b>       |        |                                                                                                                                                                                                                                                                                                       |                                      |
| Objectives              | 2      | Provide an explicit statement of the main objective(s) or question(s) the review addresses.                                                                                                                                                                                                           | Reported                             |
| <b>METHODS</b>          |        |                                                                                                                                                                                                                                                                                                       |                                      |
| Eligibility criteria    | 3      | Specify the inclusion and exclusion criteria for the review.                                                                                                                                                                                                                                          | Partially reported (250 words limit) |
| Information sources     | 4      | Specify the information sources (e.g. databases, registers) used to identify studies and the date when each was last searched.                                                                                                                                                                        | Not reported (250 words limit)       |
| Risk of bias            | 5      | Specify the methods used to assess risk of bias in the included studies.                                                                                                                                                                                                                              | Not reported (250 words limit)       |
| Synthesis of results    | 6      | Specify the methods used to present and synthesise results.                                                                                                                                                                                                                                           | Not reported (250 words limit)       |
| <b>RESULTS</b>          |        |                                                                                                                                                                                                                                                                                                       |                                      |
| Included studies        | 7      | Give the total number of included studies and participants and summarise relevant characteristics of studies.                                                                                                                                                                                         | Reported                             |
| Synthesis of results    | 8      | Present results for main outcomes, preferably indicating the number of included studies and participants for each. If meta-analysis was done, report the summary estimate and confidence/credible interval. If comparing groups, indicate the direction of the effect (i.e. which group is favoured). | Partially reported (250 words limit) |
| <b>DISCUSSION</b>       |        |                                                                                                                                                                                                                                                                                                       |                                      |
| Limitations of evidence | 9      | Provide a brief summary of the limitations of the evidence included in the review (e.g. study risk of bias, inconsistency and imprecision).                                                                                                                                                           | Partially reported (250 words limit) |
| Interpretation          | 10     | Provide a general interpretation of the results and important implications.                                                                                                                                                                                                                           | Reported                             |
| <b>OTHER</b>            |        |                                                                                                                                                                                                                                                                                                       |                                      |
| Funding                 | 11     | Specify the primary source of funding for the review.                                                                                                                                                                                                                                                 | No funding received                  |
| Registration            | 12     | Provide the register name and registration number.                                                                                                                                                                                                                                                    | Reported                             |

*Manuscript*

| Section and Topic             | Item # | Checklist item                                                                                                                                                                                                                                                                                       | Location where item is reported |
|-------------------------------|--------|------------------------------------------------------------------------------------------------------------------------------------------------------------------------------------------------------------------------------------------------------------------------------------------------------|---------------------------------|
| <b>TITLE</b>                  |        |                                                                                                                                                                                                                                                                                                      |                                 |
| Title                         | 1      | Identify the report as a systematic review.                                                                                                                                                                                                                                                          | 1                               |
| <b>ABSTRACT</b>               |        |                                                                                                                                                                                                                                                                                                      |                                 |
| Abstract                      | 2      | See the PRISMA 2020 for Abstracts checklist.                                                                                                                                                                                                                                                         | Suppl.                          |
| <b>INTRODUCTION</b>           |        |                                                                                                                                                                                                                                                                                                      |                                 |
| Rationale                     | 3      | Describe the rationale for the review in the context of existing knowledge.                                                                                                                                                                                                                          | 3, 4                            |
| Objectives                    | 4      | Provide an explicit statement of the objective(s) or question(s) the review addresses.                                                                                                                                                                                                               | 4                               |
| <b>METHODS</b>                |        |                                                                                                                                                                                                                                                                                                      |                                 |
| Eligibility criteria          | 5      | Specify the inclusion and exclusion criteria for the review and how studies were grouped for the syntheses.                                                                                                                                                                                          | 5, 6                            |
| Information sources           | 6      | Specify all databases, registers, websites, organisations, reference lists and other sources searched or consulted to identify studies. Specify the date when each source was last searched or consulted.                                                                                            | 5                               |
| Search strategy               | 7      | Present the full search strategies for all databases, registers and websites, including any filters and limits used.                                                                                                                                                                                 | Suppl.                          |
| Selection process             | 8      | Specify the methods used to decide whether a study met the inclusion criteria of the review, including how many reviewers screened each record and each report retrieved, whether they worked independently, and if applicable, details of automation tools used in the process.                     | 5, 6                            |
| Data collection process       | 9      | Specify the methods used to collect data from reports, including how many reviewers collected data from each report, whether they worked independently, any processes for obtaining or confirming data from study investigators, and if applicable, details of automation tools used in the process. | 5, 6                            |
| Data items                    | 10a    | List and define all outcomes for which data were sought. Specify whether all results that were compatible with each outcome domain in each study were sought (e.g. for all measures, time points, analyses), and if not, the methods used to decide which results to collect.                        | 6, 7                            |
|                               | 10b    | List and define all other variables for which data were sought (e.g. participant and intervention characteristics, funding sources). Describe any assumptions made about any missing or unclear information.                                                                                         | 6, 7                            |
| Study risk of bias assessment | 11     | Specify the methods used to assess risk of bias in the included studies, including details of the tool(s) used, how many reviewers assessed each study and whether they worked independently, and if applicable, details of automation tools used in the process.                                    | 7                               |
| Effect measures               | 12     | Specify for each outcome the effect measure(s) (e.g. risk ratio, mean difference) used in the synthesis or presentation of results.                                                                                                                                                                  | 7                               |
| Synthesis methods             | 13a    | Describe the processes used to decide which studies were eligible for each synthesis (e.g. tabulating the study intervention characteristics and comparing against the planned groups for each synthesis (item #5)).                                                                                 | 7                               |
|                               | 13b    | Describe any methods required to prepare the data for presentation or synthesis, such as handling of missing summary statistics, or data conversions.                                                                                                                                                | 7, 8                            |
|                               | 13c    | Describe any methods used to tabulate or visually display results of individual studies and syntheses.                                                                                                                                                                                               | 7, 8                            |
|                               | 13d    | Describe any methods used to synthesize results and provide a rationale for the choice(s). If meta-analysis was performed, describe the model(s), method(s) to identify the presence and extent of statistical heterogeneity, and software package(s) used.                                          | 7, 8                            |
|                               | 13e    | Describe any methods used to explore possible causes of heterogeneity among study results (e.g. subgroup analysis, meta-regression).                                                                                                                                                                 | 8                               |
|                               | 13f    | Describe any sensitivity analyses conducted to assess robustness of the synthesized results.                                                                                                                                                                                                         | 8                               |
| Reporting bias assessment     | 14     | Describe any methods used to assess risk of bias due to missing results in a synthesis (arising from reporting biases).                                                                                                                                                                              | 7, 8                            |
| Certainty assessment          | 15     | Describe any methods used to assess certainty (or confidence) in the body of evidence for an outcome.                                                                                                                                                                                                | 8                               |

| Section and Topic                              | Item # | Checklist item                                                                                                                                                                                                                                                                       | Location where item is reported |
|------------------------------------------------|--------|--------------------------------------------------------------------------------------------------------------------------------------------------------------------------------------------------------------------------------------------------------------------------------------|---------------------------------|
| <b>RESULTS</b>                                 |        |                                                                                                                                                                                                                                                                                      |                                 |
| Study selection                                | 16a    | Describe the results of the search and selection process, from the number of records identified in the search to the number of studies included in the review, ideally using a flow diagram.                                                                                         | 9, Figure 1                     |
|                                                | 16b    | Cite studies that might appear to meet the inclusion criteria, but which were excluded, and explain why they were excluded.                                                                                                                                                          | Figure 1                        |
| Study characteristics                          | 17     | Cite each included study and present its characteristics.                                                                                                                                                                                                                            | 9, Table 1                      |
| Risk of bias in studies                        | 18     | Present assessments of risk of bias for each included study.                                                                                                                                                                                                                         | 9, Figure 2.                    |
| Results of individual studies                  | 19     | For all outcomes, present, for each study: (a) summary statistics for each group (where appropriate) and (b) an effect estimate and its precision (e.g. confidence/credible interval), ideally using structured tables or plots.                                                     | Figures, suppl.                 |
| Results of syntheses                           | 20a    | For each synthesis, briefly summarise the characteristics and risk of bias among contributing studies.                                                                                                                                                                               | 9-11                            |
|                                                | 20b    | Present results of all statistical syntheses conducted. If meta-analysis was done, present for each the summary estimate and its precision (e.g. confidence/credible interval) and measures of statistical heterogeneity. If comparing groups, describe the direction of the effect. | 9-11                            |
|                                                | 20c    | Present results of all investigations of possible causes of heterogeneity among study results.                                                                                                                                                                                       | 12, Table 3                     |
|                                                | 20d    | Present results of all sensitivity analyses conducted to assess the robustness of the synthesized results.                                                                                                                                                                           | 12                              |
| Reporting biases                               | 21     | Present assessments of risk of bias due to missing results (arising from reporting biases) for each synthesis assessed.                                                                                                                                                              | 10                              |
| Certainty of evidence                          | 22     | Present assessments of certainty (or confidence) in the body of evidence for each outcome assessed.                                                                                                                                                                                  | 9-11, Table 2                   |
| <b>DISCUSSION</b>                              |        |                                                                                                                                                                                                                                                                                      |                                 |
| Discussion                                     | 23a    | Provide a general interpretation of the results in the context of other evidence.                                                                                                                                                                                                    | 13-15                           |
|                                                | 23b    | Discuss any limitations of the evidence included in the review.                                                                                                                                                                                                                      | 15                              |
|                                                | 23c    | Discuss any limitations of the review processes used.                                                                                                                                                                                                                                | 15                              |
|                                                | 23d    | Discuss implications of the results for practice, policy, and future research.                                                                                                                                                                                                       | 16                              |
| <b>OTHER INFORMATION</b>                       |        |                                                                                                                                                                                                                                                                                      |                                 |
| Registration and protocol                      | 24a    | Provide registration information for the review, including register name and registration number, or state that the review was not registered.                                                                                                                                       | 5                               |
|                                                | 24b    | Indicate where the review protocol can be accessed, or state that a protocol was not prepared.                                                                                                                                                                                       | 5                               |
|                                                | 24c    | Describe and explain any amendments to information provided at registration or in the protocol.                                                                                                                                                                                      | 5                               |
| Support                                        | 25     | Describe sources of financial or non-financial support for the review, and the role of the funders or sponsors in the review.                                                                                                                                                        | 17                              |
| Competing interests                            | 26     | Declare any competing interests of review authors.                                                                                                                                                                                                                                   | 17                              |
| Availability of data, code and other materials | 27     | Report which of the following are publicly available and where they can be found: template data collection forms; data extracted from included studies; data used for all analyses; analytic code; any other materials used in the review.                                           | 17                              |

**Supplementary Table S2. Search strategies for online databases**

*Ovid MEDLINE(R) and Epub Ahead of Print, In-Process, In-Data-Review & Other Non-Indexed Citations, Daily and Versions(R) <1946 to January, 2021>*

|    |                                                                           |         |  |
|----|---------------------------------------------------------------------------|---------|--|
| 1  | exp *Pneumonia/                                                           | 182098  |  |
| 2  | exp Pneumonia, Ventilator-Associated/                                     | 3865    |  |
| 3  | (pneumon* adj6 (ventilat* or respirator* or nosocomial* or bacteri*)).tw. | 32321   |  |
| 4  | VAP.tw.                                                                   | 4554    |  |
| 5  | (ventilator-associated adj3 pneumonia).tw.                                | 5886    |  |
| 6  | 1 or 2 or 3 or 4 or 5                                                     | 204130  |  |
| 7  | Probiotics/                                                               | 20449   |  |
| 8  | Synbiotics/                                                               | 801     |  |
| 9  | probiotic*.tw.                                                            | 28863   |  |
| 10 | synbiotic*.tw.                                                            | 1764    |  |
| 11 | exp Lactobacillus/                                                        | 30849   |  |
| 12 | exp Bifidobacterium/                                                      | 6595    |  |
| 13 | lactobacil*.tw,nm.                                                        | 39585   |  |
| 14 | (bifidus or bifidobacter*).tw,nm.                                         | 12249   |  |
| 15 | streptococc*.tw,nm.                                                       | 106749  |  |
| 16 | actococc*.tw,nm.                                                          | 3       |  |
| 17 | leuconostoc*.tw,nm.                                                       | 2923    |  |
| 18 | pediococc*.tw,nm.                                                         | 2140    |  |
| 19 | (beneficial adj3 bacter*).tw.                                             | 2899    |  |
| 20 | 7 or 8 or 9 or 10 or 11 or 12 or 13 or 14 or 15 or 16 or 17 or 18 or 19   | 176017  |  |
| 21 | randomized controlled trial.pt.                                           | 550449  |  |
| 22 | controlled clinical trial.pt.                                             | 94541   |  |
| 23 | randomized.ab.                                                            | 540719  |  |
| 24 | placebo.ab.                                                               | 223187  |  |
| 25 | clinical trials as topic.sh.                                              | 198124  |  |
| 26 | randomly.ab.                                                              | 369974  |  |
| 27 | trial.ti.                                                                 | 251267  |  |
| 28 | 21 or 22 or 23 or 24 or 25 or 26 or 27                                    | 1407415 |  |

29 exp animals/ not humans.sh. 4915987  
 30 28 not 29 1294924  
 31 6 and 20 and 30 506

*Embase 1947-Present, updated daily*

1 exp \*Pneumonia/ 125285  
 2 exp ventilator associated pneumonia/ 11868  
 3 (pneumon\* adj6 (ventilat\* or respirator\* or nosocomial\* or bacteri\*)).tw. 49079  
 4 VAP.tw. 7594  
 5 (ventilator-associated adj3 pneumonia).tw. 9058  
 6 1 or 2 or 3 or 4 or 5 162341  
 7 Probiotics/ 42741  
 8 Synbiotics/ 2204  
 9 probiotic\*.tw. 36802  
 10 synbiotic\*.tw. 2191  
 11 exp Lactobacillus/ 56260  
 12 exp Bifidobacterium/ 16498  
 13 lactobacil\*.tw. 47295  
 14 (bifidus or bifidobacter\*).tw. 15659  
 15 streptococc\*.tw. 132959  
 16 lactococc\*.tw. 8217  
 17 leuconostoc\*.tw. 3259  
 18 pediococc\*.tw. 2238  
 19 (beneficial adj3 bacter\*).tw. 3175  
 20 7 or 8 or 9 or 10 or 11 or 12 or 13 or 14 or 15 or 16 or 17 or 18 or 19 233141  
 21 Randomized controlled trial/ 686270  
 22 Controlled clinical trial/ 464824  
 23 random\$.ti,ab. 1737066  
 24 randomization/ 92449  
 25 intermethod comparison/ 277199  
 26 placebo.ti,ab. 337091

- 27 (compare or compared or comparison).ti. 581704
- 28 ((evaluated or evaluate or evaluating or assessed or assess) and (compare or compared or comparing or comparison)).ab. 2406236
- 29 (open adj label).ti,ab. 92304
- 30 ((double or single or doubly or singly) adj (blind or blinded or blindly)).ti,ab. 255820
- 31 double blind procedure/ 192148
- 32 parallel group\$1.ti,ab. 28424
- 33 (crossover or cross over).ti,ab. 114883
- 34 ((assign\$ or match or matched or allocation) adj5 (alternate or group\$1 or intervention\$1 or patient\$1 or subject\$1 or participant\$1)).ti,ab. 369100
- 35 (assigned or allocated).ti,ab. 434983
- 36 (controlled adj7 (study or design or trial)).ti,ab. 396159
- 37 (volunteer or volunteers).ti,ab. 268503
- 38 human experiment/ 559965
- 39 trial.ti. 351518
- 40 21 or 22 or 23 or 24 or 25 or 26 or 27 or 28 or 29 or 30 or 31 or 32 or 33 or 34 or 35 or 36 or 37 or 38 or 39 5652852
- 41 (random\$ adj sampl\$ adj7 (cross section\$ or questionnaire\$1 or survey\$ or database\$1)).ti,ab. not (comparative study/ or controlled study/ or randomi?ed controlled.ti,ab. or randomly assigned.ti,ab.) 8876
- 42 Cross-sectional study/ not (randomized controlled trial/ or controlled clinical study/ or controlled study/ or randomi?ed controlled.ti,ab. or control group\$1.ti,ab.) 288579
- 43 (((case adj control\$) and random\$) not randomi?ed controlled).ti,ab. 19129
- 44 (Systematic review not (trial or study)).ti. 191504
- 45 (nonrandom\$ not random\$).ti,ab. 17515
- 46 Random field\$.ti,ab. 2612
- 47 (random cluster adj3 sampl\$).ti,ab. 1400
- 48 (review.ab. and review.pt.) not trial.ti. 940638
- 49 we searched.ab. and (review.ti. or review.pt.) 39062
- 50 update review.ab. 118
- 51 (databases adj4 searched).ab. 46484
- 52 (rat or rats or mouse or mice or swine or porcine or murine or sheep or lambs or pigs or piglets or rabbit or rabbits or cat or cats or dog or dogs or cattle or bovine or monkey or monkeys or trout or marmoset\$1).ti. and animal experiment/ 1128717
- 53 Animal experiment/ not (human experiment/ or human/) 2372363

54 or/41-53 3831856  
 55 40 not 54 5022886  
 56 6 and 20 and 55 1514

*CENTRAL via The Cochrane Library*

#1 MeSH descriptor: [Pneumonia] explode all trees 5114  
 #2 MeSH descriptor: [Pneumonia, Ventilator-Associated] explode all trees 350  
 #3 (pneumon\* NEAR/6 (ventilat\* or respirator\* or nosocomial\* or bacteri\*)):ti,ab,kw 4952  
 #4 (VAP):ti,ab,kw 1006  
 #5 (ventilator-associated NEAR/3 pneumonia):ti,ab,kw (Word variations have been searched)  
 1670  
 #6 {OR #1-#5} 8668  
 #7 MeSH descriptor: [Probiotics] this term only 2315  
 #8 MeSH descriptor: [Synbiotics] this term only 182  
 #9 (probiotic OR synbiotic):ti,ab,kw (Word variations have been searched) 8306  
 #10 MeSH descriptor: [Lactobacillus] explode all trees 1723  
 #11 MeSH descriptor: [Bifidobacterium] explode all trees 794  
 #12 (lactobacil\*):ti,ab,kw 5828  
 #13 ((bifidus or bifidobacter\*)):ti,ab,kw 3398  
 #14 (streptococc\*):ti,ab,kw 6093  
 #15 (actococc\*):ti,ab,kw 0  
 #16 (leuconostoc\*):ti,ab,kw 31  
 #17 (pediococc\*):ti,ab,kw 70  
 #18 ((beneficial NEAR/3 bacter\*)):ti,ab,kw 246  
 #19 {OR #7-#18} 15992  
 #20 #6 AND #19 687



**Supplementary Figure S1.** Funnel plot for incidence of VAP

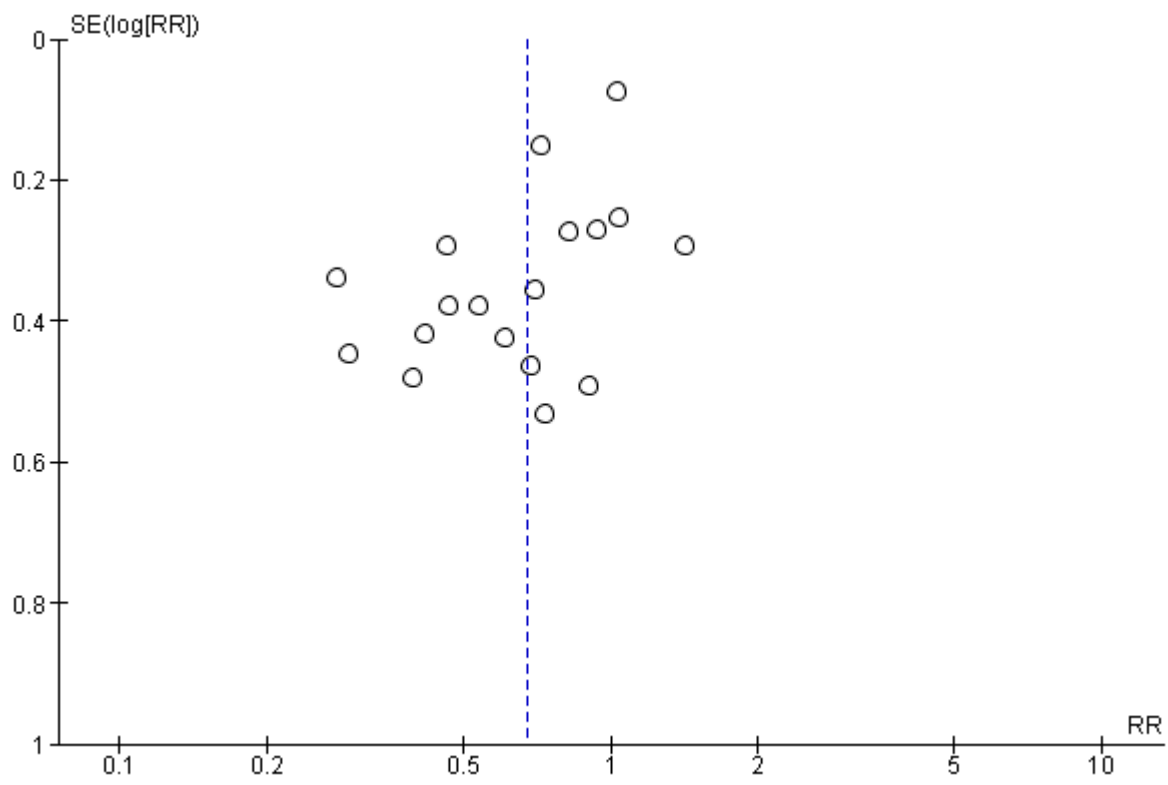

**Supplementary Figure S2.** Effect of probiotics on the duration of mechanical ventilation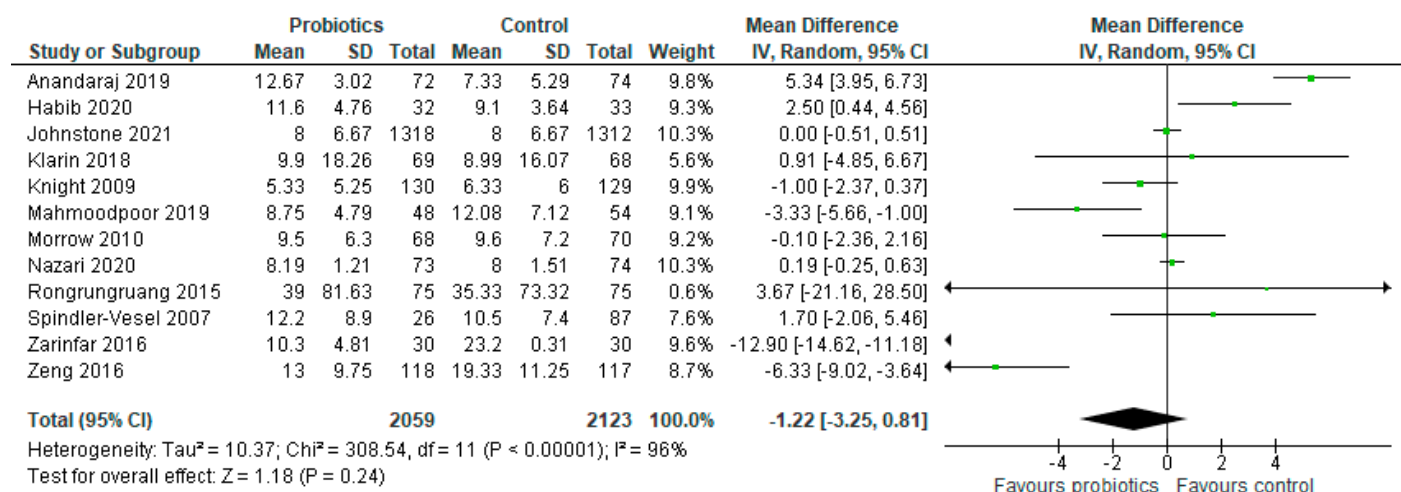**Supplementary Figure S3.** Funnel plot for the duration of mechanical ventilation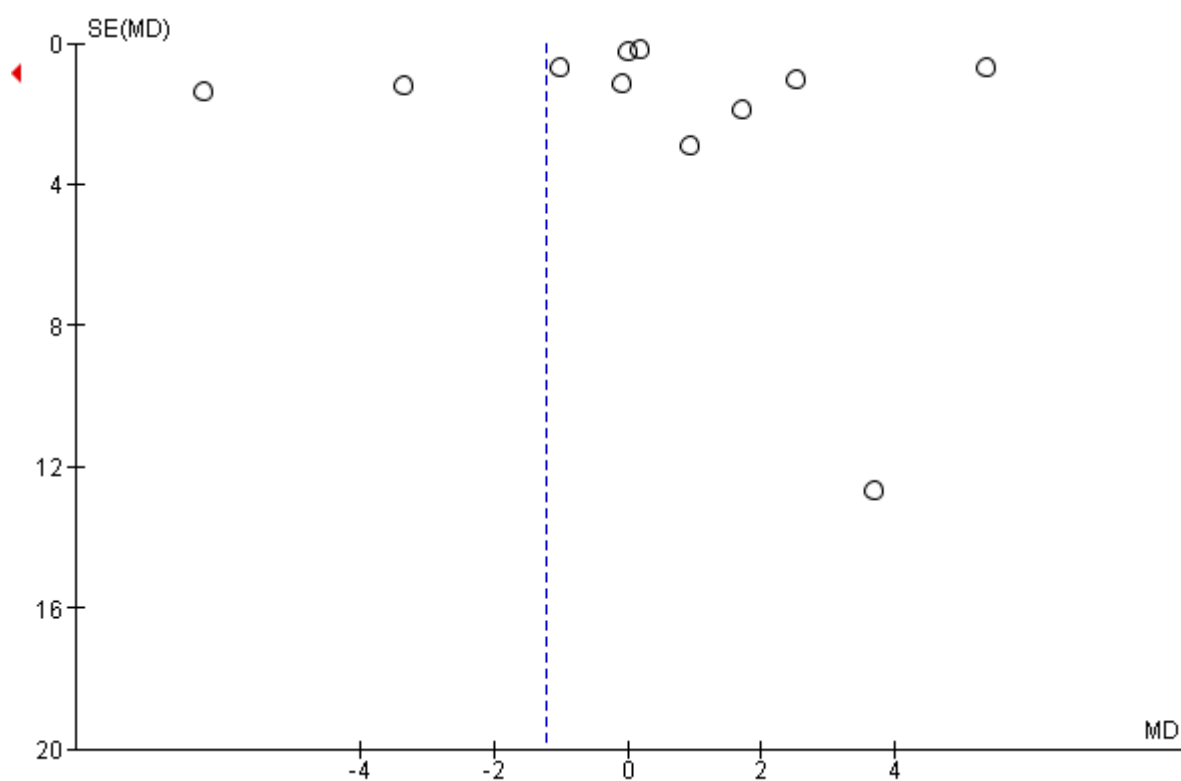

**Supplementary Figure S4.** Effect of probiotics on the length of ICU stay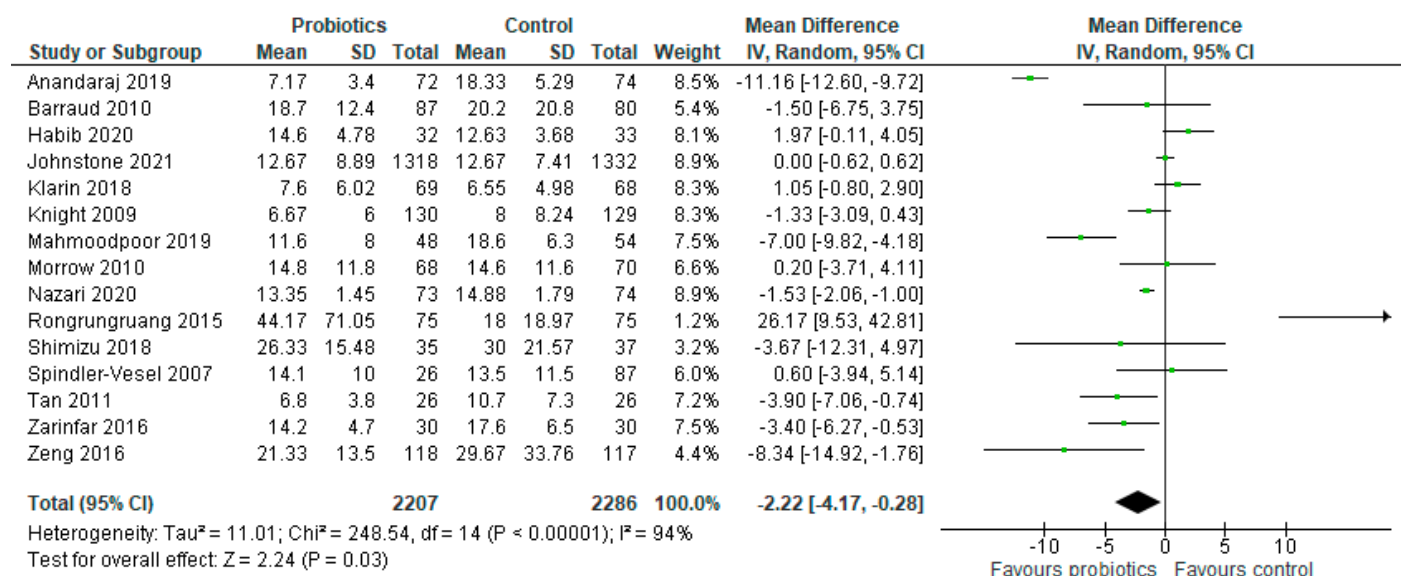**Supplementary Figure S5.** Funnel plot for the length of ICU stay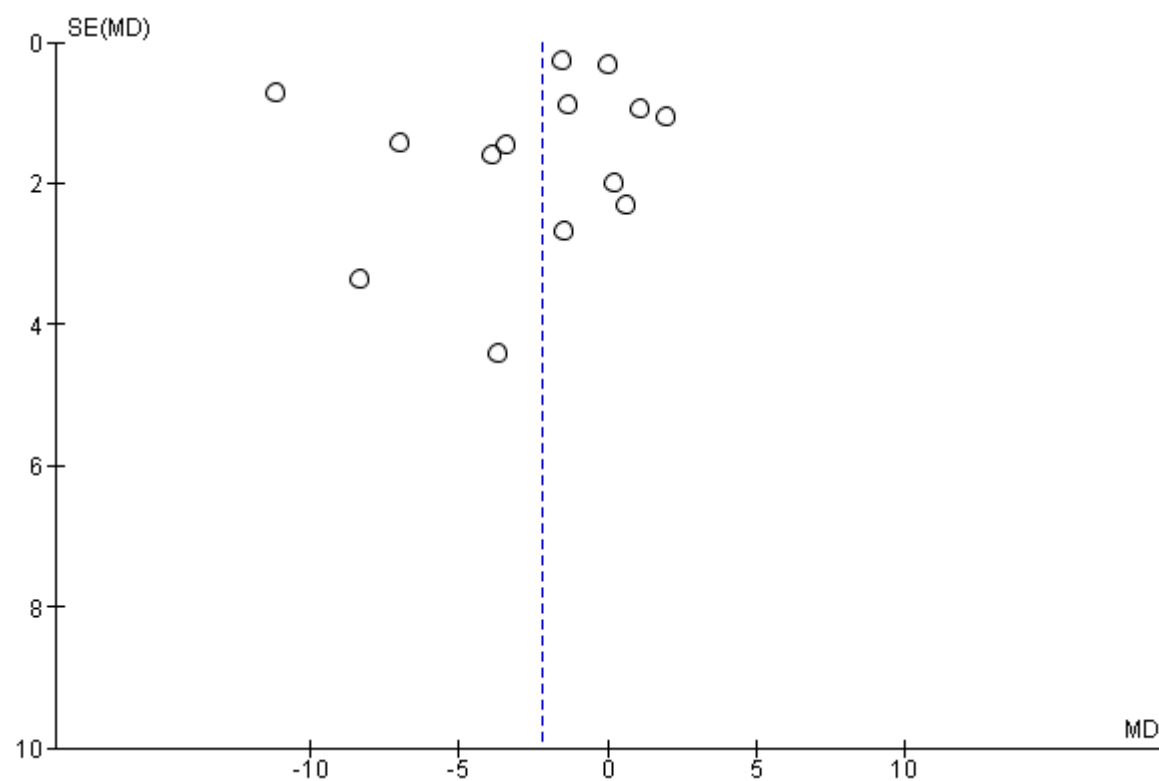

Supplementary Figure S6. Effect of probiotics on the length of hospital stay

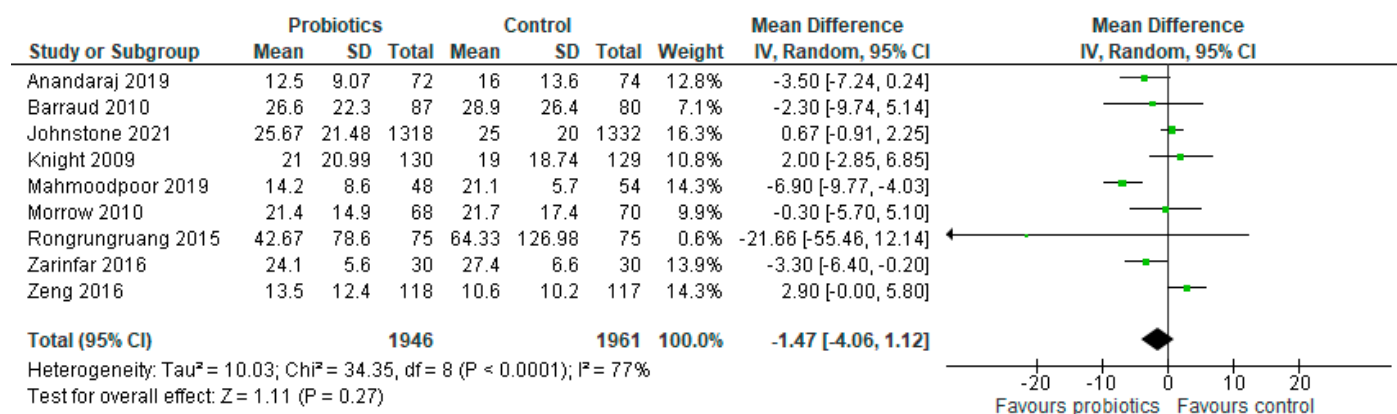

Supplementary Figure S7. Doi plot for the length of hospital stay

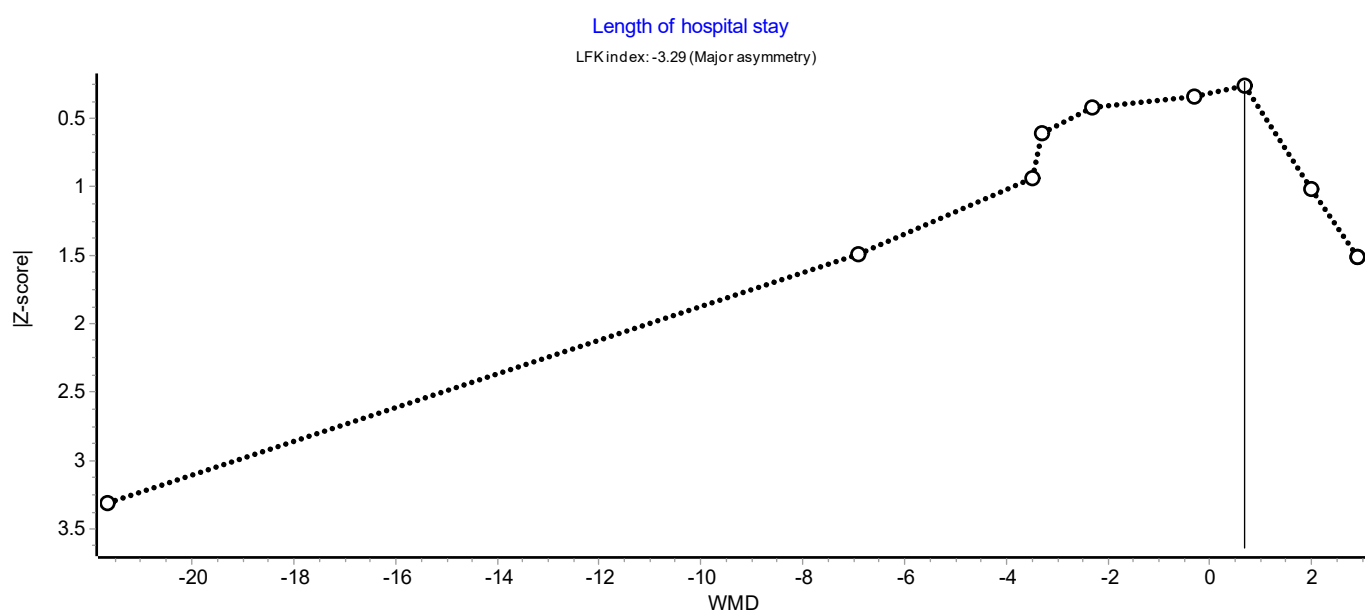

**Supplementary Figure S8.** Effect of probiotics on: a) ICU mortality; b) Hospital mortality; c) 28/30-day mortality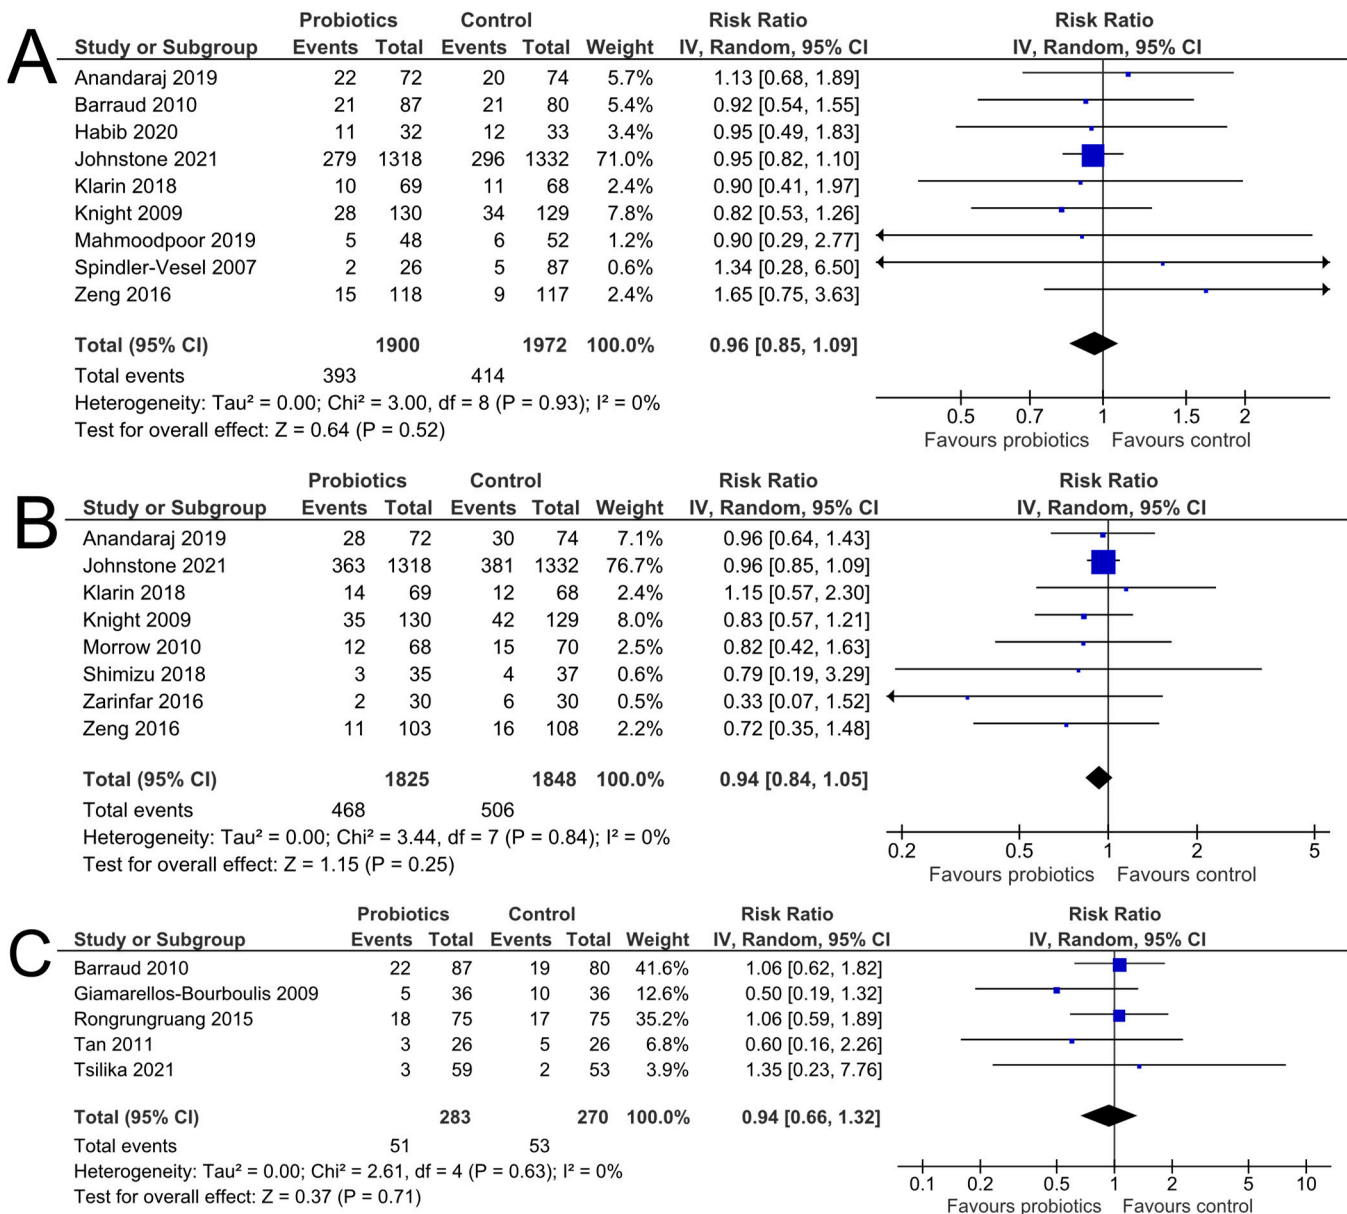

Supplementary Figure S9. Doi plot for ICU mortality

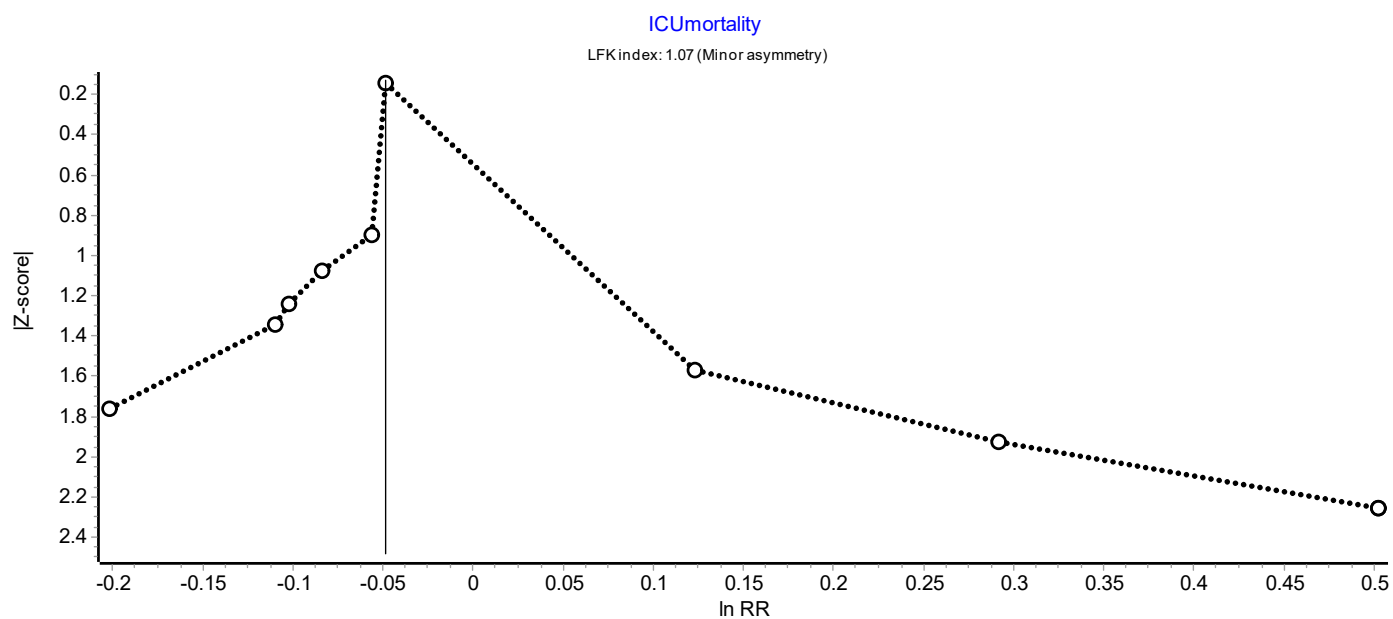

Supplementary Figure S10. Doi plot for hospital mortality

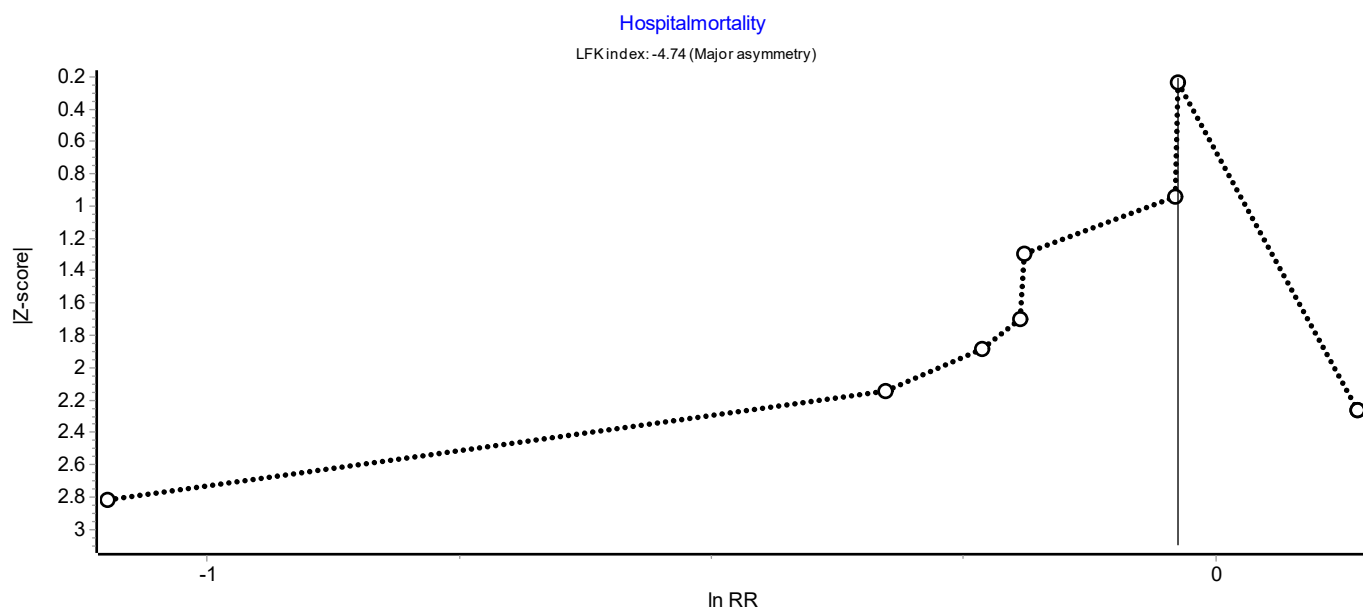

**Supplementary Figure S11.** Doi plot for 28/30-day mortality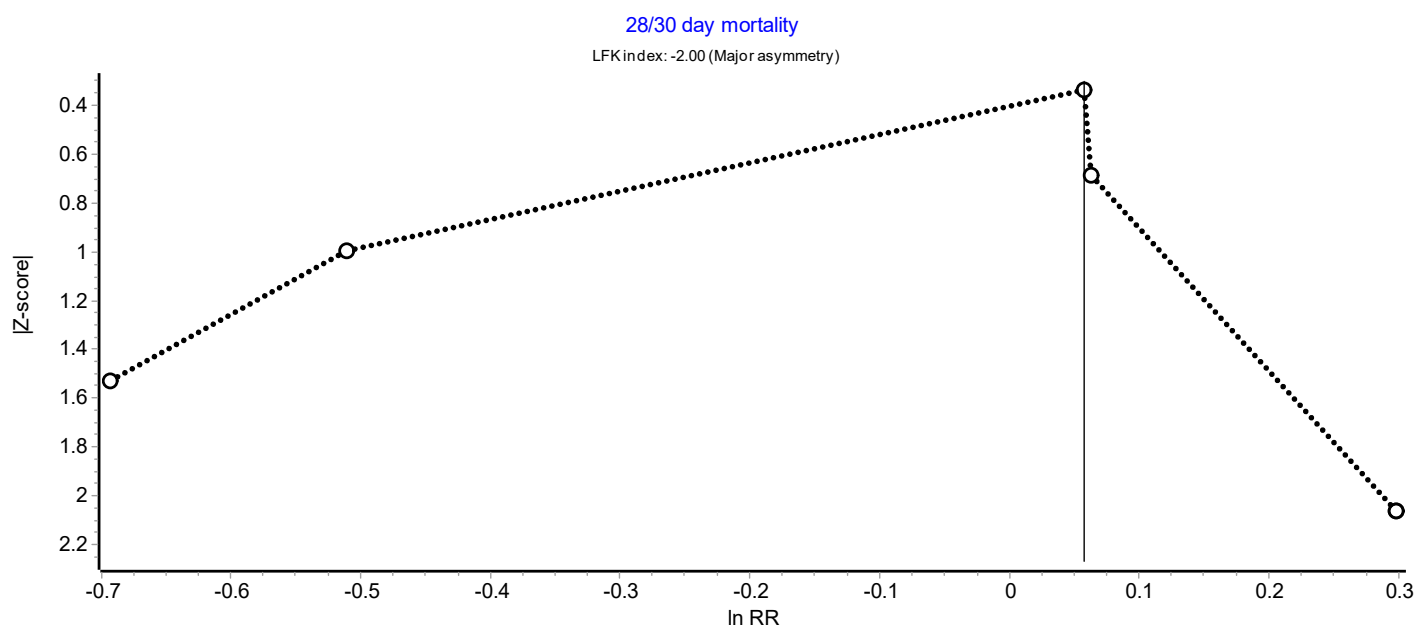

**Supplementary Figure S12.** Effect of probiotics on the duration of antibiotic use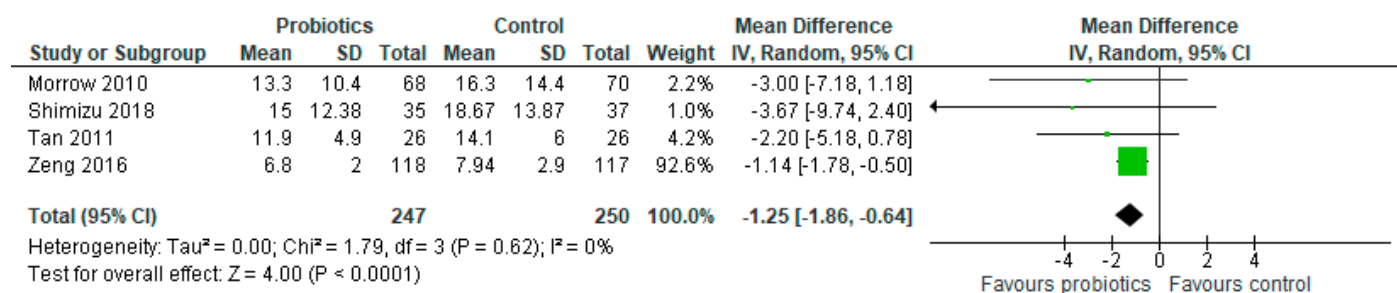**Supplementary Figure S13.** Doi plot for the duration of antibiotic use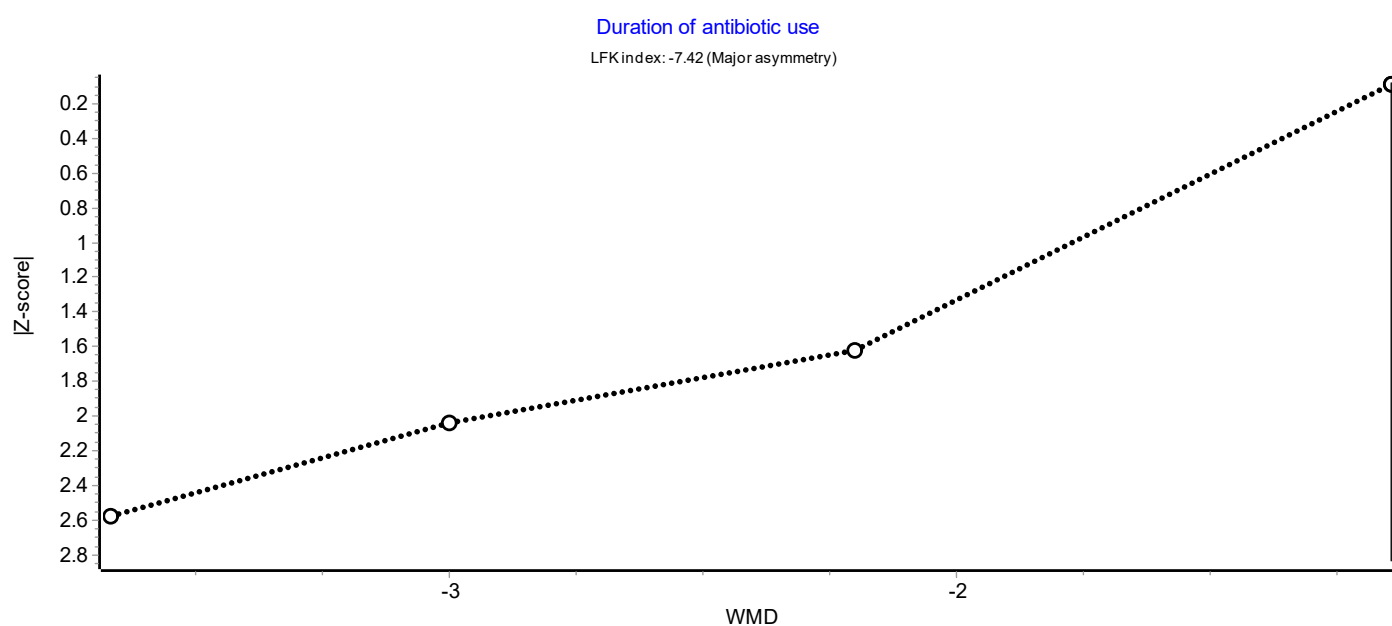



Supplementary Figure S14. Effect of probiotics on the incidence of diarrhoea

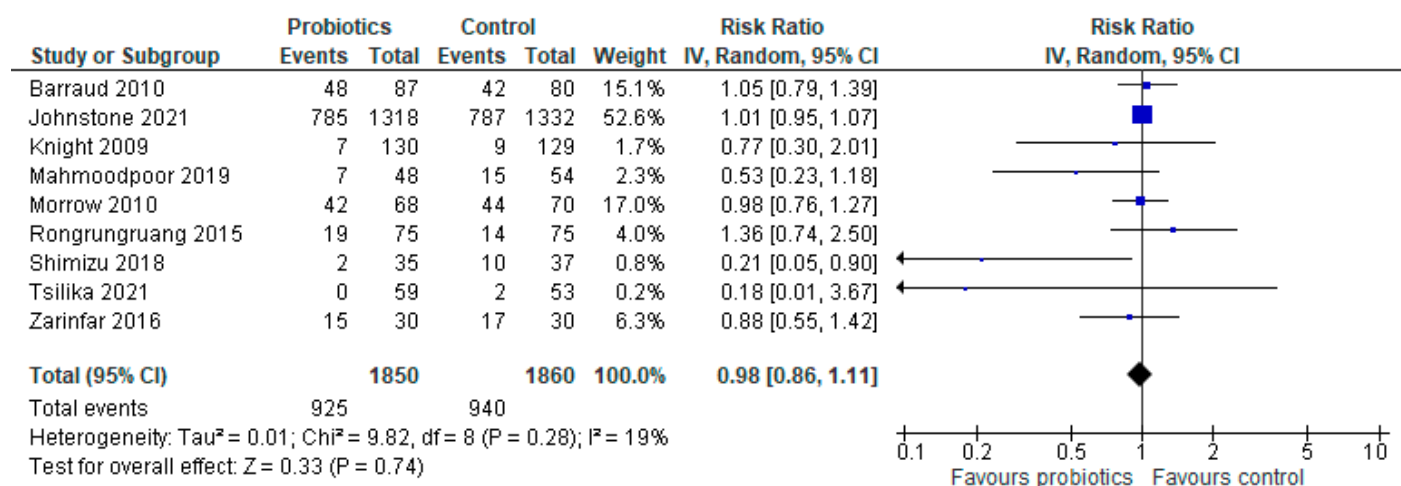

Supplementary Figure S15. Doi plot for the incidence of diarrhoea

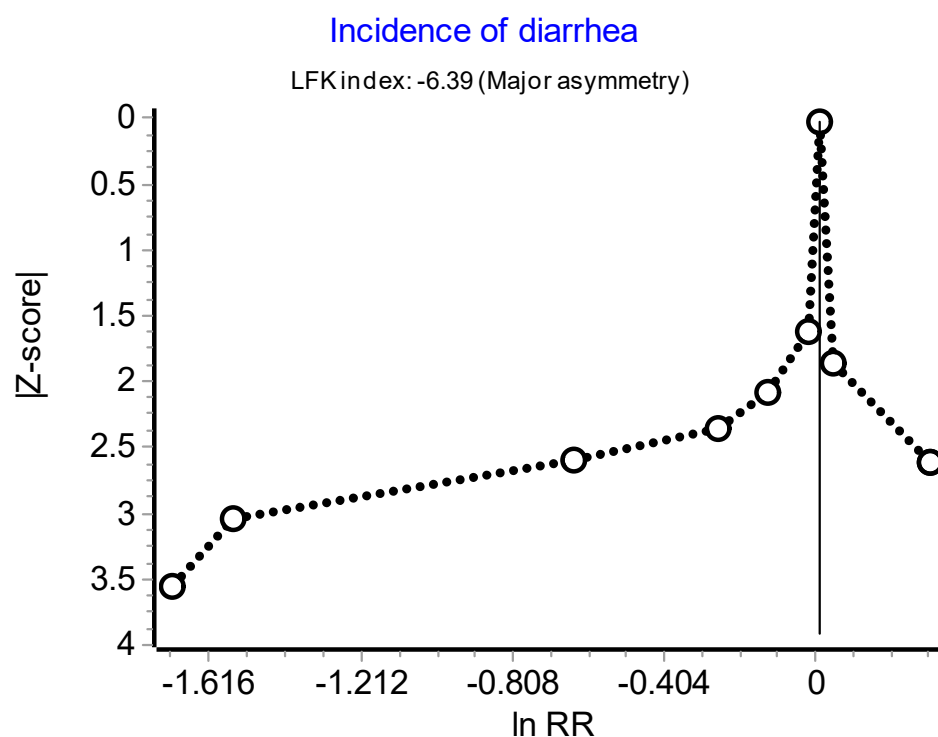

**Supplementary Figure S16.** Sensitivity analysis by excluding studies at some concerns of bias in the randomization process

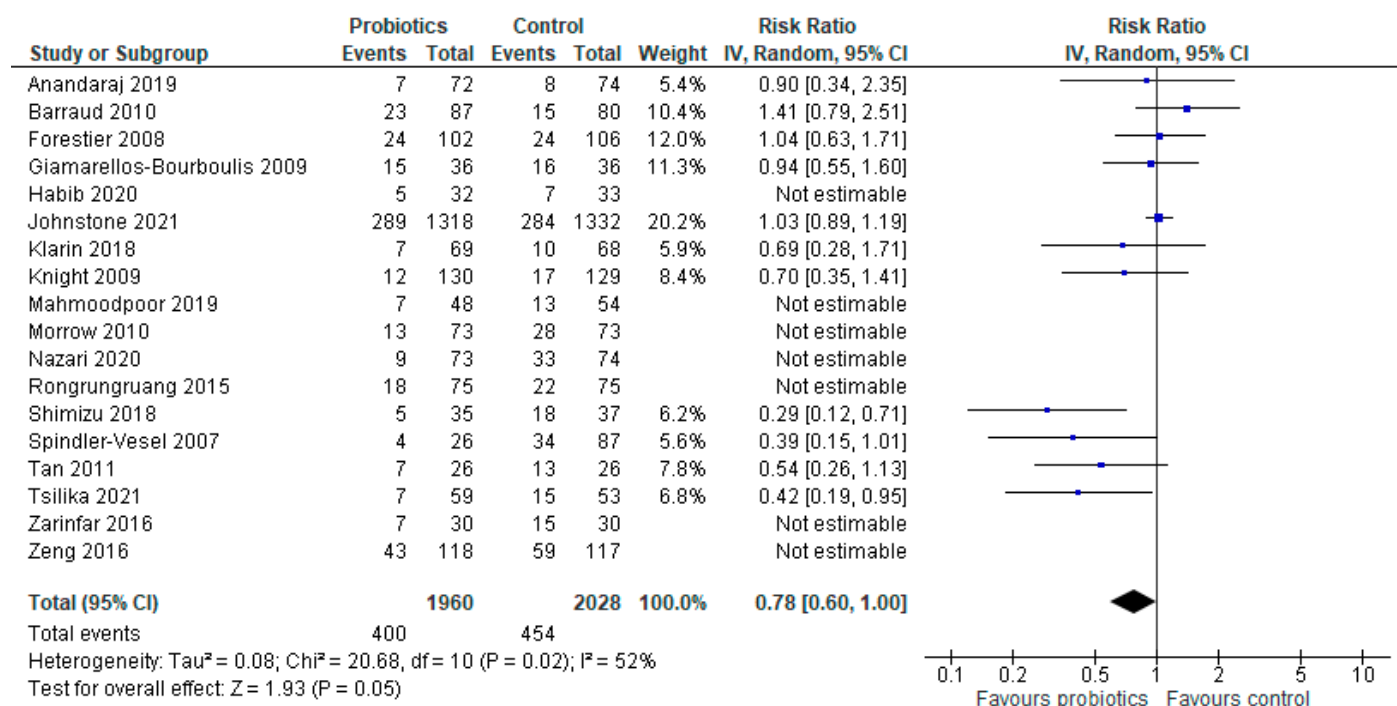

Supplement: s1 [file s1]
